# Supplementary material
Source: PubMed Central journal article supplement (PMC7186181)
Supplement: supp_RA120.012604_158171_2_supp_490866_q6zk31.pdf [file supp_RA120.012604_158171_2_supp_490866_q6zk31.pdf]

## Glycation-mediated inter-protein crosslinking is promoted by chaperone-client complexes of $\alpha$ -crystallin: Implications for lens aging and presbyopia

Sandip K. Nandi, Rooban B. Nahomi, Johanna Rankenberg, Marcus A. Glomb and Ram H. Nagaraj

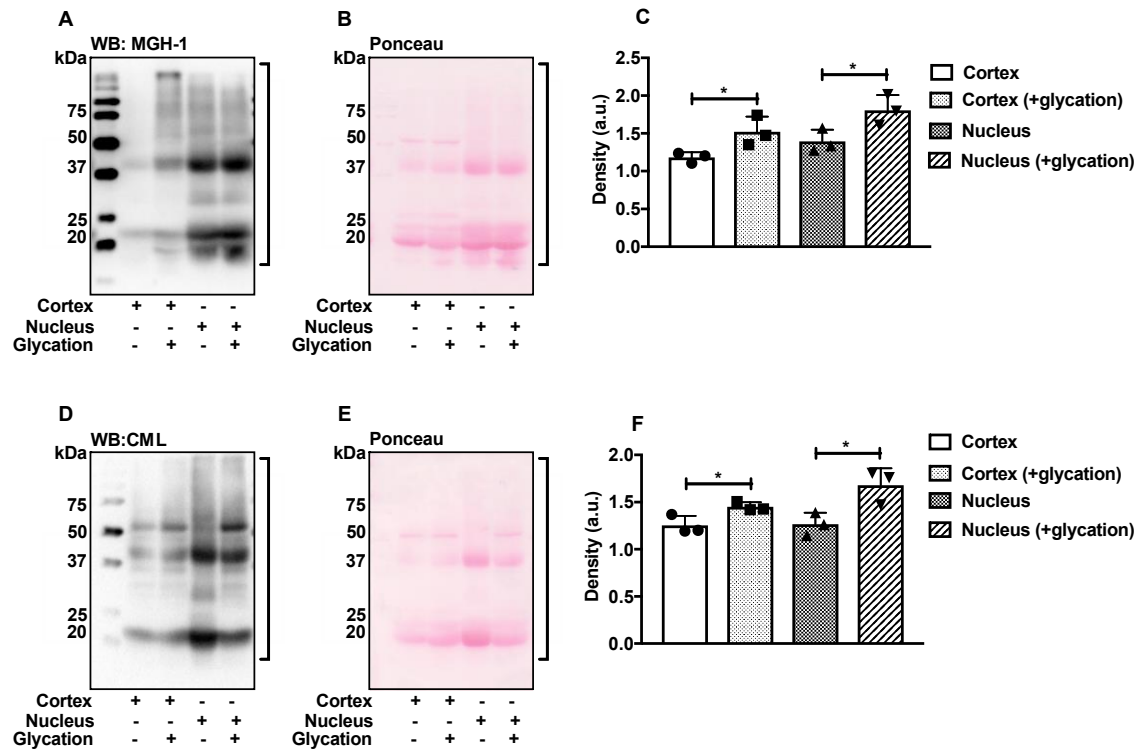

**Supplemental figure S1. Both cortical and nuclear proteins of human lens are AGE-modified upon glycation.** Human lenses were incubated for 3 days with a glycating mixture (25 mM glucose, 500  $\mu$ M MGO and 500  $\mu$ M erythrulose) in MEM. Water-soluble protein isolated from the lens nucleus and cortex were western blotted using a MGH-1 (A) or a CML (D) antibody. Protein loading in western blots is shown in panels B and E. The bar graphs in panel C and F represent mean  $\pm$  SD of MGH-1 and CML levels, determined by densitometric analysis of western blots and ponceau stained membranes (areas in brackets). \* $p < 0.05$
